# Supplementary material for: Associations of Multiparametric Breast MRI Features, Tumor-Infiltrating Lymphocytes, and Immune Gene Signature Scores Following a Single Dose of Trastuzumab in HER2-Positive Early-Stage Breast Cancer
Source: MDPI journal article supplement (doi:10.3390/cancers15174337), 2023-08-30
Supplement: s1 [file s1]

## SUPPLEMENTAL FIGURES

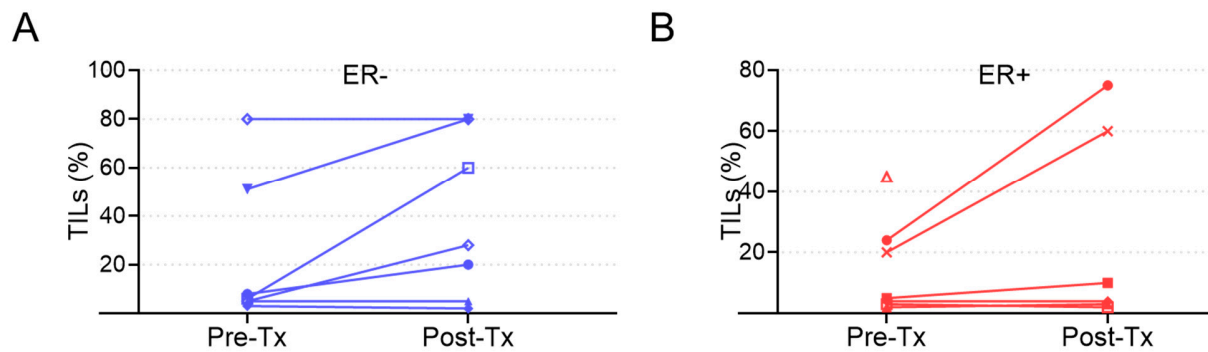

**Figure S1. Tumor-infiltrating lymphocyte (TIL) distribution by hormone receptor status before and after trastuzumab treatment.** **A.** Pre- and post-treatment TIL levels for patients with ER- breast cancer only. Post-treatment TILs were significantly higher than pre-treatment TILs (paired t-test,  $p < 0.05$ ). **B** Pre- and post-treatment TIL levels for patients with ER+ breast cancer only. One ER+ patient had pre-treatment tissue available only due to lack of research biopsy after a single dose of trastuzumab. Post-treatment TILs trended towards being higher than pre-treatment TILs ( $p = 0.08$ ).

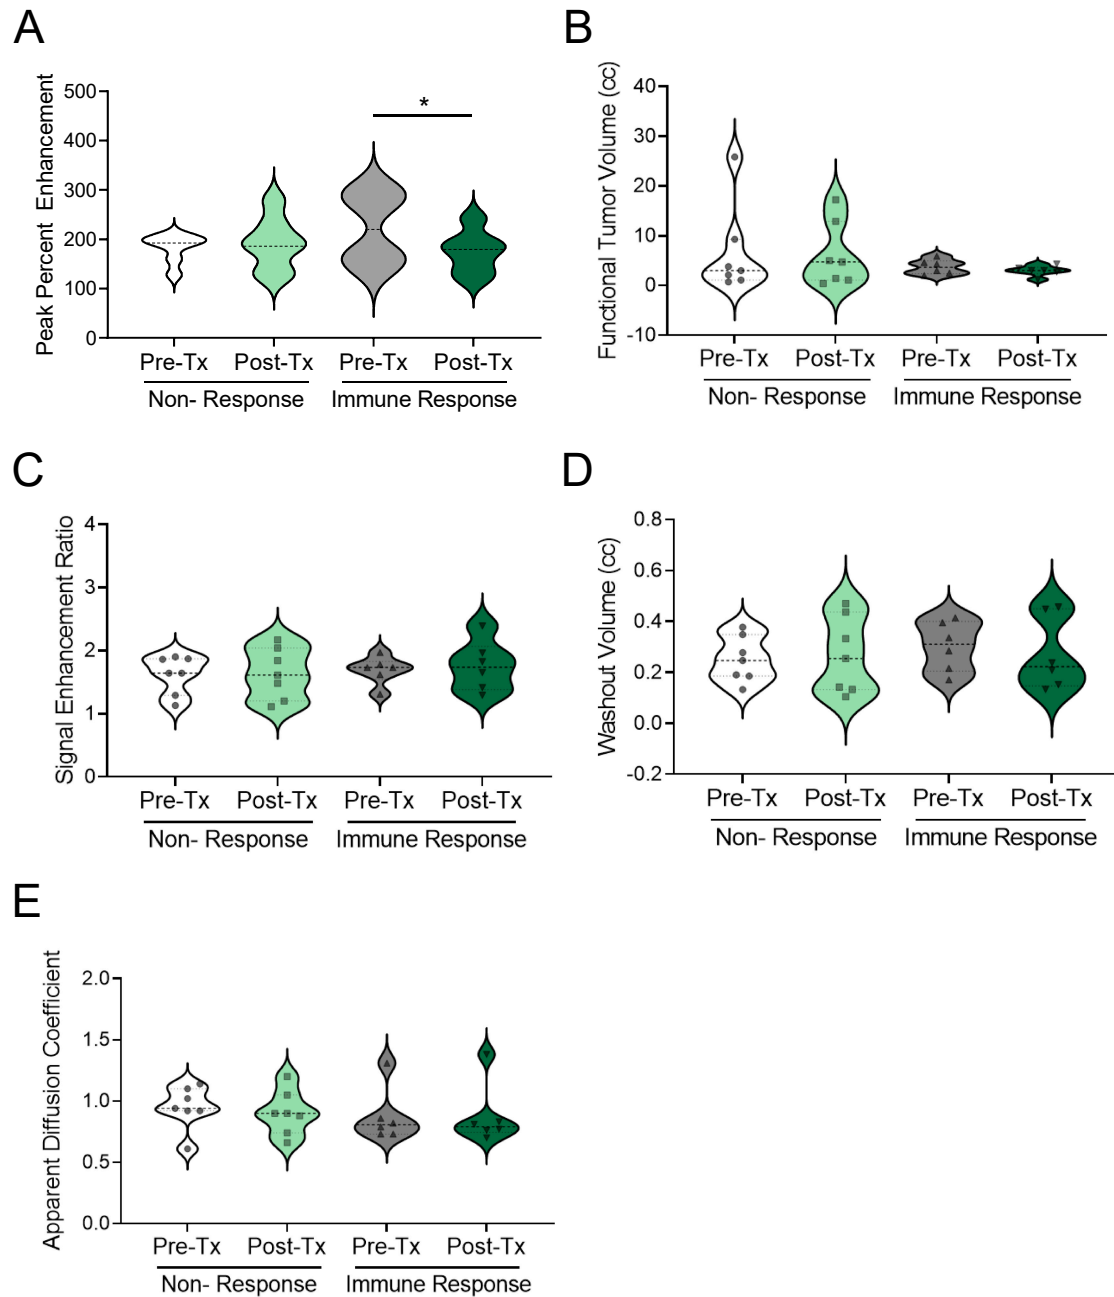

**Figure S2. MRI features in groups with or without immune response.** Immune response was defined as an increase in TIL content by more than a decile. **A** Peak percent enhancement. Significant difference observed between Pre-Tx and Post-Tx within the immune response cohort (paired t-test,  $p = 0.02$ ). **B**. Functional tumor volume (FTV), **C**. signal enhancement ratio (SER), **D**. combined wash-out volume (WF), and **E**) apparent diffusion coefficient (ADC). Asterisk (\*) indicates  $p < 0.05$ .

**Table S1. Individual patient data for imaging feature correlation with stromal tumor-infiltrating lymphocytes (sTILs).** The stromal TILs are reported as deciles. Decile 1.0 = 0-9%, 2.0 = 10-19%, 3.0 = 20-29%, 4.0 = 30-39%, 5.0 = 40-49%, 6.0 = 50-59%, 7.0 = 60-69%, 8.0 = 70-79%, 9.0 = 80-89%, 10 = 90-99%. The functional tumor volume (FTV), combined wash-out volume percentage (WF), peak percent enhancement (PE), and signal enhancement ratio (SER) were all derived from the dynamic-contrast enhanced images. The apparent diffusion coefficient (ADC) was derived from a representative tumor plane from the diffusion-weighted imaging. Patient 8 did not have a post-trastuzumab tissue sample available for assessment.

| Pt ID  | sTILs (decile) |      | fTV (cc) |      | WF    |       | PE (%) |      | SER  |      | ADC (x10 <sup>-3</sup> mm <sup>2</sup> /sec) |      |
|--------|----------------|------|----------|------|-------|-------|--------|------|------|------|----------------------------------------------|------|
|        | Pre            | Post | Pre      | Post | Pre   | Post  | Pre    | Post | Pre  | Post | Pre                                          | Post |
| 1      | 1              | 3.5  | 4.3      | 4.3  | 0.17  | 0.237 | 173    | 139  | 1.62 | 1.65 | 0.82                                         | 0.81 |
| 2      | 6              | 9    | 4.6      | 3    | 0.285 | 0.132 | 137    | 118  | 1.73 | 1.41 | 0.86                                         | 0.83 |
| 3      | 9              | 9    | 3        | 1.4  | 0.185 | 0.254 | 192    | 185  | 1.64 | 1.84 | 0.92                                         | 0.9  |
| 4      | 1.5            | 7    | 3        | 2.7  | 0.336 | 0.208 | 303    | 190  | 1.73 | 1.82 | 0.73                                         | 0.7  |
| 5      | 1.5            | 3    | 2.5      | 1.2  | 0.216 | 0.151 | 163    | 168  | 1.31 | 1.29 | 1.31                                         | 1.38 |
| 6      | 1              | 1    | 25.8     | 12.9 | 0.132 | 0.142 | 201    | 186  | 1.64 | 1.48 | 1.14                                         | 1.2  |
| 7      | 1              | 1    | 9.3      | 17.2 | 0.277 | 0.332 | 201    | 279  | 1.86 | 2.04 | 1.1                                          | 1.05 |
| 8      | 5.5            |      | 19.3     | 1.5  | 0.554 | 0.254 | 210    | 111  | 1.97 | 1.16 | 0.78                                         | 1.03 |
| 9      | 3              | 8.5  | 2        | 3.5  | 0.395 | 0.456 | 291    | 242  | 1.97 | 2.39 | 0.73                                         | 0.77 |
| 10     | 3              | 7    | 5.9      | 3    | 0.414 | 0.447 | 267    | 191  | 1.78 | 1.96 | 0.79                                         | 0.76 |
| 11     | 1              | 1    | 0.7      | 0.4  | 0.246 | 0.132 | 128    | 136  | 1.13 | 1.11 | 0.92                                         | 0.9  |
| 12     | 1              | 1    | 1.1      | 1.1  | 0.377 | 0.437 | 191    | 198  | 1.9  | 1.61 | 0.94                                         | 0.88 |
| 13     | 1              | 2    | 2.1      | 5    | 0.348 | 0.47  | 207    | 231  | 1.87 | 2.17 | 0.61                                         | 0.66 |
| 14     | 1              | 1    | 3.8      | 4.7  | 0.19  | 0.104 | 160    | 124  | 1.29 | 1.2  | 1.02                                         | 0.74 |
| Median | 1.5            | 2.5  | 3        | 3    | 0.285 | 0.254 | 201    | 186  | 1.73 | 1.61 | 0.92                                         | 0.88 |
